# Supplementary material
Source: PubMed Central journal article supplement (PMC6885608)
Supplement: supp_RA119.009591_153205_2_supp_405569_pyyvnz.pdf [file supp_RA119.009591_153205_2_supp_405569_pyyvnz.pdf]

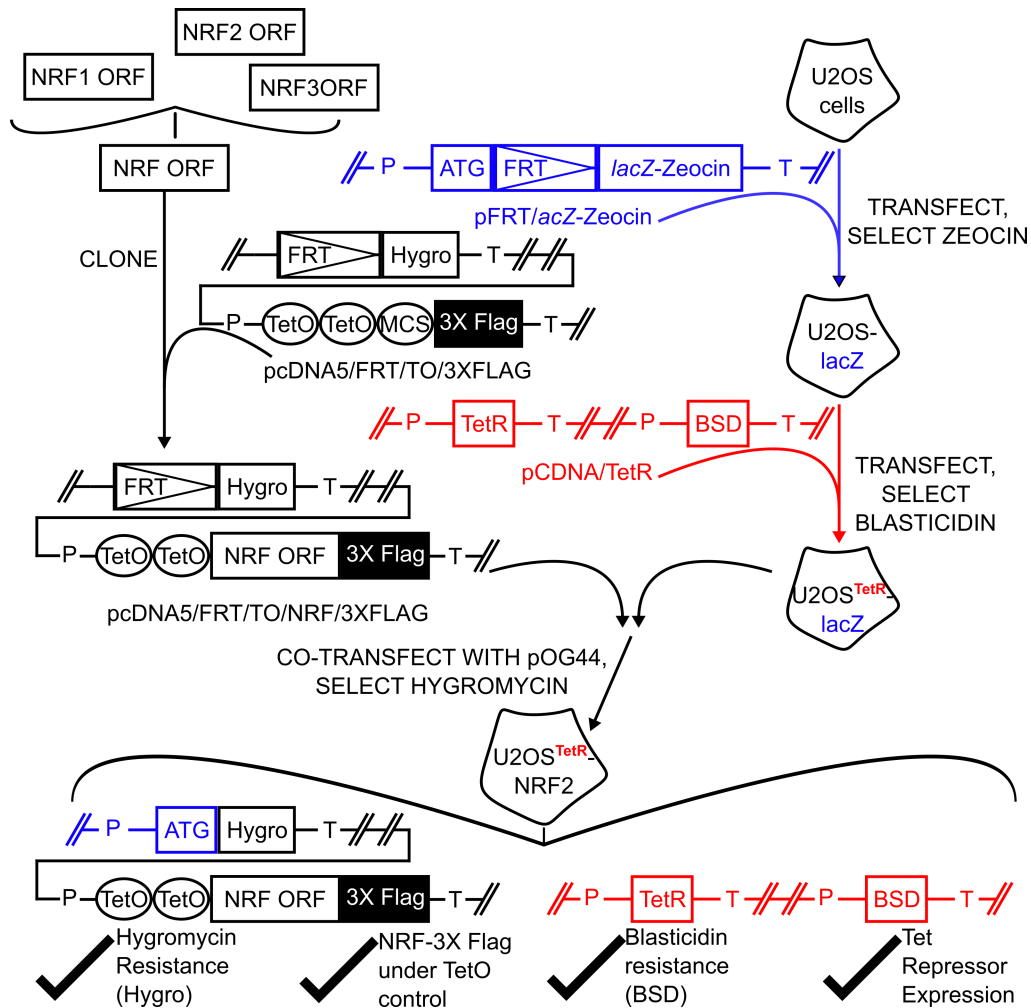

**Figure S1. Schematic of NRF flip-in design.** Related to Figure 1 and materials and methods section. U2OS cells were transfected with pFRT*lacZ*-Zeocin carrying a start codon ATG, Flp Recombination Target site (FRT), and *lacZ*-Zeocin open reading frame flanked by a constitutive promoter (P) and terminator (T) (blue). Cells with stable incorporation of this plasmid were selected for with zeocin and termed U2OS-*lacZ*. U2OS-*lacZ* cells were transfected with pCDNA/TetR carrying a TetR open reading frame and blasticidin resistance gene (Blasticidin-S-Deaminase, BSD) each under control of a constitutive promoter and terminator (red). Cells with stable incorporation of this plasmid were selected for with blasticidin and termed U2OS<sup>TetR</sup>-*lacZ*. While U2OS<sup>TetR</sup>-*lacZ* cells were being generated, the modified open reading frames (ORFs) of NRF members NRF1, NRF2, and NRF3 (collectively NRFX) were each cloned into pcDNA5/FRT/TO/3XFLAG vector (black, see **Figure 1B** for modifications to NRF ORFs). Each vector contained a FRT sequence followed by a hygromycin resistance gene and terminator, and a second cassette consisting of a promoter, two Tet operons, the NRF open reading frame joined in sequence to a triple FLAG sequence, and a terminator. The pcDNA5/FRT/TO/NRFX/3XFLAG vectors were co-transfected into U2OS<sup>TetR</sup>-*lacZ* with pOG44, which encodes Flp recombinase, to generate U2OS<sup>TetR</sup>-NRFX. U2OS<sup>TetR</sup>-NRFX cells with proper incorporation of pcDNA5/FRT/TO/NRFX/3XFLAG at the FRT were selected for with hygromycin. U2OS<sup>TetR</sup>-NRFX cells thus expressed hygromycin resistance gene, NRF member tagged with triple FLAG sequence under tet-operon control, blasticidin resistance gene, and Tet repressor.

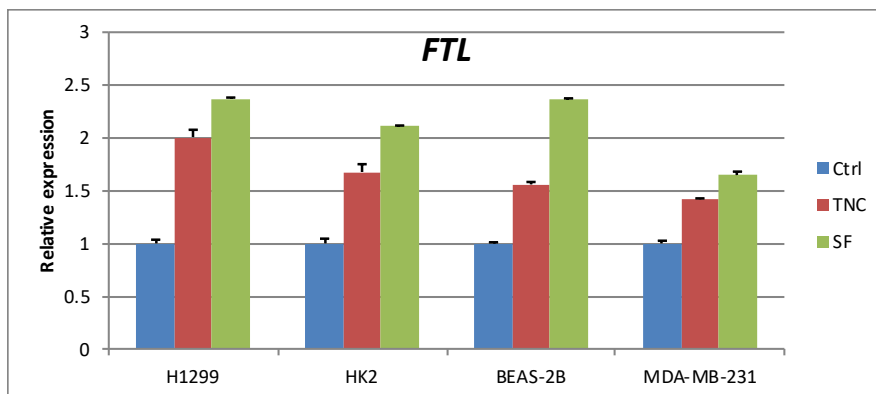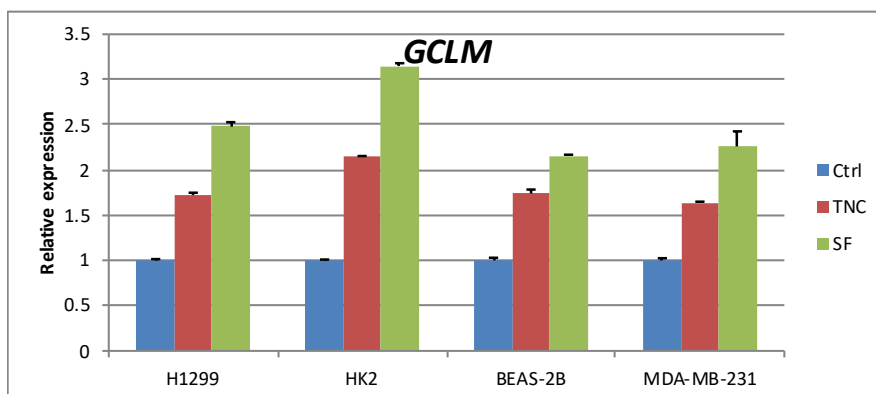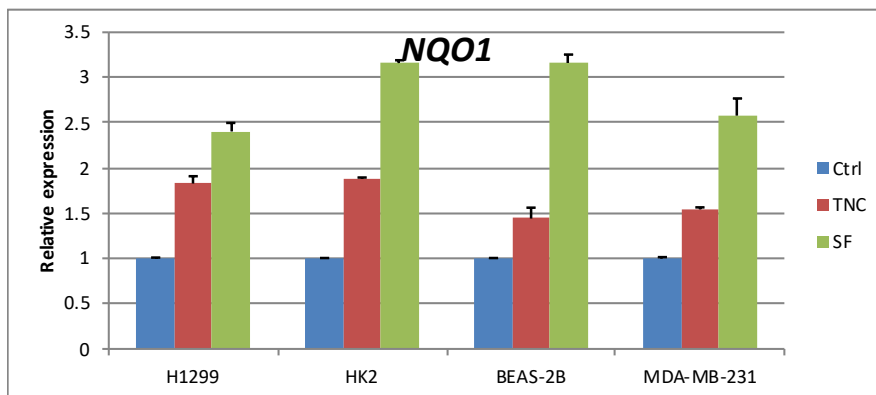

**Figure S2. RT-qPCR of mRNA levels of *FTL*, *GCLM*, and *NQO1*.** Total RNA was harvested after 16-hour treatment with either vehicle (Ctrl), 5  $\mu\text{g}/\text{mL}$  tunicamycin (TNC), or 5  $\mu\text{M}$  sulforaphane (SF) and prepared for qPCR analysis of transcript levels.

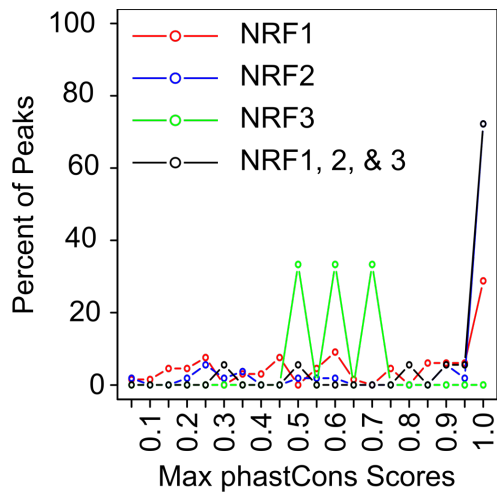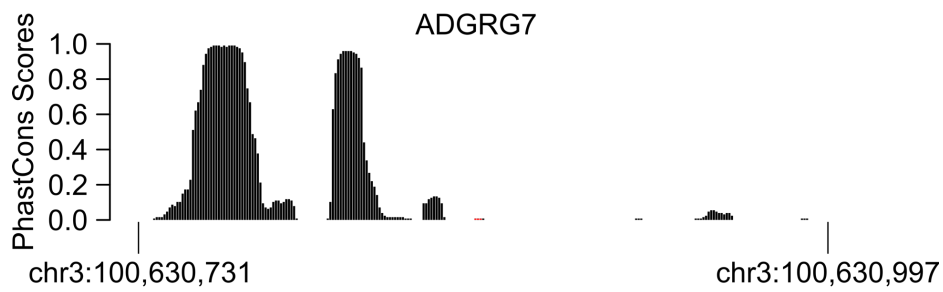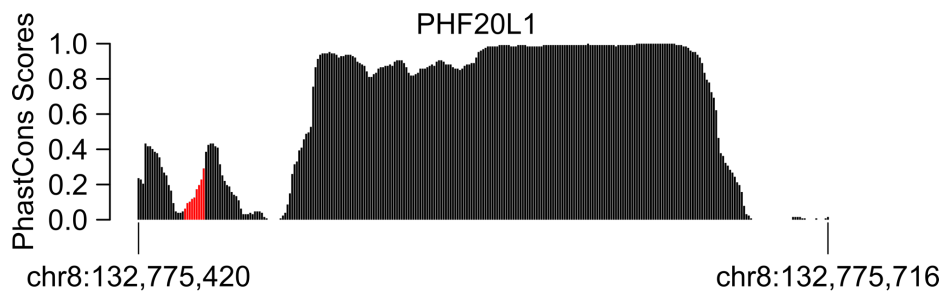

**Figure S3. Sequence conservation of ChIP peaks across vertebrates.** Analyzed vertebrates include human, chimp, rhesus, mouse, rat, dog, and opossum. Red colored bars in PhastCons plots represent ARE bases.
